# Supplementary material for: HiPSC-Derived Hepatocyte-like Cells Can Be Used as a Model for Transcriptomics-Based Study of Chemical Toxicity
Source: MDPI journal article supplement (doi:10.3390/toxics10010001), 2021-12-21
Supplement: s1 [file s1]

# Supplementary Materials: HiPSC-Derived Hepatocyte-Like Cells Can be Used as a Model for Transcriptomics-Based Study of Chemical Toxicity

Sreya Ghosh, Jonathan De Smedt, Tine Tricot, Susana Proença, Manoj Kumar, Fatemeharefeh Nami, Thomas Vanwelden, Niels Vidal, Paul Jennings, Nynke I. Kramer and Catherine M. Verfaillie

## Supplementary methods

### 1. Characterisation of the SBAD2-FRT and SBAD2-3X iPSC Lines (Figures. S2-S5):

#### 1.2 Quantitative Analysis of Trilineage Differentiation:

SBAD2-FRT iPSCs were differentiated to embryoid bodies to test for their ability to differentiate to all three lineages. Differentiation to the three germ layers and loss of pluripotency was analysed using the ScoreCard methodology (Thermo Fisher Scientific) according to manufacturer instructions [1].

Immunofluorescence staining for pluripotency markers: Fixed undifferentiated SBAD2-FRT iPSCs were stained for pluripotency markers as described in the Immunofluorescence staining section in Methods, and imaged on an Axioimager Z1 microscope. The antibodies are listed in table S3.

#### 1.3 SNP Profiling:

To demonstrate SBAD2 iPSC identity, a reference panel of 32 SNPs was analysed using TaqMan assay (Life Technologies) on DNA from the SBAD2 and SBAD2-FRT iPSCs. The analysis was done using Genotyper Software.

#### 1.4 Genome Integrity Verification:

The CytoSure Syndrome Plus 60K array (Oxford Gene Technology, Oxford, UK) was used for assessing the genome integrity of the original SBAD2 iPSC line and the SBAD2-FRT iPSC line. Arrays were scanned using an Agilent microarray scanner at 2 µm resolution, followed by calculation of signal intensities using Feature Extraction software (Agilent Technologies). Visualization of results and data analysis was performed using the CytoSure Interpret Software (Oxford Gene Technology) and the circular binary segmentation algorithm.

#### 1.5 Junction PCR:

3' and 5' junctions of the *AAVS1* locus were amplified using PCR and visualised on a 1% agarose gel. The primer sets used for the 3' and 5' junction assay PCR of the SBAD2-FRT iPSCs and the 3' junction assay for the SBAD2-3x line are listed in table S1.

#### 1.6 Southern Blot:

To determine whether the genomic integration of the FRT cassette was mono or biallelic, southern blotting was performed on the SBAD2-FRT iPSC. Briefly, the 5' internal probe (table S1) was labelled by PCR using Digoxigenin-dNTPs (Roche). The genomic DNA was digested using the Nco1 restriction enzyme (NEB) and run on 0.7% agarose gel. The bands were transferred using a capillary flow setup onto a Zeta probe membrane (Biorad). The membrane was hybridised with the probe and exposed to an X-ray film to develop the image.

### 1.7 Flow Cytometry:

Cells were detached, resuspended in 100 µl buffer (1% bovine serum albumin in PBS) and analyzed on a Canto HTS flow cytometer (BD Biosciences) to determine the respective fractions of GFP positive or negative cells. After exclusion of cell doublets, GFP fluorescence was determined on the FL1-FITC channel. For the SBAD2-FRT iPSCs, the population of cells that expressed GFP was quantified, as a sign of presence of the inserted cassette. Following RMCE of the transcription factor cassette, the SBAD2-3x iPSCs were again analysed by FACS to demonstrate removal of the GFP cassette (percentage of GFP-negative cells). Data was analysed using FlowJo software (BD Biosciences).

**Table S1.** PCR primers and southern blot probes.

| Primer/Probe                      | Sequence                | Primer Direction | PCR Cycle                                                                                                       |
|-----------------------------------|-------------------------|------------------|-----------------------------------------------------------------------------------------------------------------|
| 5'JA-FRT line                     | CACTTTGAGCTCTACTGGCTTC  | forward          | 95 °C, 5'–[95 °C, 30''–68 °C (–0.5 °C/cycle), 1' 30'']X15–[95 °C, 30''–58 °C, 30''–72 °C, 1' 30'']X25–72 °C, 5' |
|                                   | CGTTACTATGGGAACATACGTCA | reverse          |                                                                                                                 |
| 3'JA-FRT line                     | TAACTGAAACACGGAAGGAG    | forward          | 95 °C, 5'–[95 °C, 30''–68 °C (–0.5 °C/cycle), 1' 30'']X15–[95 °C, 30''–58 °C, 30''–72 °C, 1' 30'']X25–72 °C, 5' |
|                                   | AAGGCAGCCTGGTAGACA      | reverse          |                                                                                                                 |
| 5' JA-3X line                     | CACTTTGAGCTCTACTGGCTTC  | forward          | 95 °C, 5'–[95 °C, 30''–72 °C (–0.5 °C/cycle), 1' 30'']X15–[95 °C, 30''–64 °C, 30''–72 °C, 1' 30'']X25–72 °C, 5' |
|                                   | CATGTTAGAAGACTTCCTCTGC  | reverse          |                                                                                                                 |
| 5' Internal probe (southern blot) | CTTCTCTGACCTGCATTCTC    | forward          | <b>Labelling Cycle</b><br>95 °C, 2'–[95 °C, 30''–58 °C, 30''–72 °C, 45'']X30–72 °C, 7'                          |
|                                   | CTGCCCAAATGAAAGGAGT     | reverse          |                                                                                                                 |

**Table S2.** Media compositions.

#### (a) Liver differentiation medium (LDM).

| Liver Differentiation Media (LDM) | Catalog Number | Supplier   | Volume for 500 mL (mL) |
|-----------------------------------|----------------|------------|------------------------|
| DMEM LG                           | 31885          | Invitrogen | 285                    |
| MCDB pH=7.2                       | M6770          | Sigma      | 200                    |
| Pen/Strep                         | 15140          | Invitrogen | 5                      |
| L-Ascorbic Acid                   | A8960          | Sigma      | 5                      |
| ITS                               | 4140–045       | Invitrogen | 1.25                   |
| LA-BSA                            | L9530          | Sigma      | 1.25                   |
| β-Mercapto                        | 31350          | Invitrogen | 0.5                    |
| Dexamethasone                     | D-2915         | Sigma      | 2                      |

## (b) LDM with amino acids (LDMAA).

| <b>Liver Differentiation Media with Amino Acids (LDMAA)</b> | <b>Catalog Number</b> | <b>Supplier</b> | <b>Volume for 650 mL (mL)</b> |
|-------------------------------------------------------------|-----------------------|-----------------|-------------------------------|
| LDM                                                         |                       |                 | 500                           |
| MEM Amino Acids Solution (50X)                              | 11130051              | Gibco           | 50                            |
| MEM Non-Essential Amino Acids Solution (100X)               | 11140035              | Gibco           | 100                           |

## (c) LDM with amino acids and additional glycine (LDMAAGLY).

| <b>Liver Differentiation Media with Amino Acids Including Glycine (LDMAAGLY)</b> | <b>Catalog Number</b> | <b>Supplier</b> | <b>Volume for 650 mL (mL)</b> |
|----------------------------------------------------------------------------------|-----------------------|-----------------|-------------------------------|
| LDM                                                                              |                       |                 | 500                           |
| MEM Amino Acids Solution (50X)                                                   | 11130051              | Gibco           | 50                            |
| MEM Non-Essential Amino Acids Solution (100X)                                    | 11140035              | Gibco           | 100                           |
| Glycine                                                                          | G8898                 | Sigma           | 2 g                           |

**Table S3.** Primer sequences used for RT-qPCR.

| Primer          | Sequences               |
|-----------------|-------------------------|
| RPL19-forward   | ATTGGTCTCATTGGGGTCTAAC  |
| RPL19-reverse   | AGTATGCTCAGGCTTCAGAAGA  |
| ALB-forward     | TGGCACAATGAAGTGGGTAA    |
| ALB-reverse     | CTGAGCAAAGGCAATCAACA    |
| HNF1A-forward   | ACACCTCAACAAGGGCACTC    |
| HNF1A-reverse   | TGGTAGCTCATCACCTGTGG    |
| CYP3A4-forward  | TTCCTCCCTGAAAGATTGAGC   |
| CYP3A4-reverse  | GTTGAAGAAGTCCTCCTAAGCT  |
| CYP2C9-forward  | TGGACATGAACAACCCTCA     |
| CYP2C9-reverse  | ACTGCAGTGTTTTCCAAGC     |
| HNF4A-forward   | ACTACGGTGCCTCGAGCTGT    |
| HNF4A-reverse   | GGCACTGGTTCCTCTTGTCT    |
| AFP-forward     | TGAGCACTGTTGCAGAGGAG    |
| AFP-reverse     | GTGGTCAGTTTGCAGCATTG    |
| G6PC-forward    | GTGTCCGTGATCGCAGACC     |
| G6PC-reverse    | GACGAGGTTGAGCCAGTCTC    |
| HNF4A-forward   | ACTACGGTGCCTCGAGCTGT    |
| HNF4A-reverse   | GGCACTGGTTCCTCTTGTCT    |
| NTCP-forward    | AACCTCAGCATTGTGATGAC    |
| NTCP-reverse    | GTATTGTGGCCGTTTGGA      |
| PEPCK-forward   | AAGAAGTGCTTTGCTCTCAG    |
| PEPCK-reverse   | CCTTAAATGACCTTGTGCGT    |
| ATF4-forward    | ATGACCGAAATGAGCTTCCTG   |
| ATF4-reverse    | GCTGGAGAACCCATGAGGT     |
| BCL2L1-forward  | GAGCTGGTGGTTGACTTTCTC   |
| BCL2L1-reverse  | TCCATCTCCGATTGAGTCCCT   |
| DDIT3-forward   | GGAAACAGAGTGGTCATTCCC   |
| DDIT3-reverse   | CTGCTTGAGCCGTTTATTCTC   |
| EIF1-forward    | GAAACGGCAGGAAGACCCCTTA  |
| EIF1-reverse    | CGGATGCTCAATTACAGTACCAT |
| HERPUD1-forward | ATGGAGTCCGAGACCGAAC     |
| HERPUD1-reverse | TTGGTGATCCAACAACAGCTT   |
| HSPA5-forward   | CATCACGCCGTCCTATGTCG    |
| HSPA5-reverse   | CGTCAAAGACCGTGTTCTCG    |
| HSPA6-forward   | GATGTGTCGGTTCTCTCCATTG  |
| HSPA6-reverse   | CTTCCATGAAGTGGTTCACGA   |
| MAFF-forward    | TCACCGCATGACTGGGTTTT    |
| MAFF-reverse    | CTGAGTTTTGTTGTGGGGCG    |
| SLC3A2-forward  | TGAATGAGTTAGAGCCCGAGA   |
| SLC3A2-reverse  | GTCTCCGCCACCTTGATCTT    |
| sXBP1_forward   | TGCTGAGTCCGCAGCAGGTG    |
| sXBP1_reverse   | GCTGGCAGGCTCTGGGGAAG    |

**Table S4.** Antibodies used for immunofluorescent staining.

| Antibody                                                                               | Company          | Catalog Number   | Dilution |
|----------------------------------------------------------------------------------------|------------------|------------------|----------|
| Mouse anti-HNF4 $\alpha$ (K9218)                                                       | Abcam            | ab41898          | 1:200    |
| Anti-Human CYP3A4                                                                      | Tebu-Bio (Cypex) | PAP 011 (150616) | 1:100    |
| Mouse anti-AFP                                                                         | R&D Systems      | MAB 1368         |          |
| Rabbit IgG                                                                             | BD Pharmingen    | 550875 (6175659) | Isotype  |
| Donkey anti-Mouse IgG (H+L) Highly Cross-Adsorbed Secondary Antibody Alexa Fluor 488   | Molecular probes | A-11029          | 1/500    |
| Donkey anti-Rabbit IgG (H+L) Highly Cross-Adsorbed Secondary Antibody. Alexa Fluor 555 | Molecular probes | A21429           | 1/500    |
| Rabbit anti-Oct4 (H-134)                                                               | Santa Cruz       | SC-9081          | 1/100    |
| Rabbit anti-SOX2                                                                       | Chemicon         | AB5603           | 1/500    |
| Goat-anti Nanog                                                                        | R&D Systems      | AF1997           | 1/400    |
| Mouse-anti TRA-1-60                                                                    | Millipore        | MAB4360          | 1/1000   |
| Mouse anti-TRA-1-81                                                                    | Cell signaling   | 4745             |          |
| Mouse anti-SSEA-1                                                                      | Santa Cruz       | sc-21702         | 1/200    |

**Table S5.** Chemicals chosen for dose-response assay treatments and drug-induced liver injury (DILI) likelihood scores

a: Dose-response assay treatments.

| Chemical                          | CAS Number  | Supplier and Catalogue Number | Vehicle | C <sub>max</sub> or Dosing Reference | C <sub>max</sub> , if Applicable ( $\mu$ M) | Treatment Concentrations     |
|-----------------------------------|-------------|-------------------------------|---------|--------------------------------------|---------------------------------------------|------------------------------|
| Amiodarone hydrochloride          | 19774-82-4  | Sigma A8423                   | DMSO    | [2]                                  | 0.806                                       | 3.21 $\mu$ M–200 $\mu$ M     |
| Busulfan                          | 55-98-1     | Sigma B2635                   | DMSO    | [2]                                  | 0.276                                       | 16.6 $\mu$ M–500 $\mu$ M     |
| Clozapine                         | 5786-21-0   | Sigma C6305                   | DMSO    | [2]                                  | 0.948                                       | 1.56 $\mu$ M–50 $\mu$ M      |
| cyclosporin A                     | 59865-13-3  | Sigma 30024                   | DMSO    | [2]                                  | 0.773                                       | 0.625 $\mu$ M–40 $\mu$ M     |
| Diclofenac sodium salt            | 15307-79-6  | Sigma D6899                   | DMSO    | [2]                                  | 7.44                                        | 14.7 $\mu$ M–470 $\mu$ M     |
| Pamidronate disodium hydrate salt | 57248-88-1  | J&K 295197                    | water   | [2]                                  | 7.16                                        | 3.21 $\mu$ M–200 $\mu$ M     |
| Cerium dioxide                    | 1306-38-3   | Sigma 544841                  | water   | [3]                                  |                                             | 1.6 $\mu$ g/mL–50 $\mu$ g/mL |
| Paraquat dichloride               | 1910-42-5   | Supelco 36541                 | water   | [4]                                  |                                             | 0.9 $\mu$ M–10 mM            |
| Ibuprofen sodium salt             | 31121-93-4  | Sigma I1892                   | ethanol | [5]                                  | 164                                         | 31.25 $\mu$ M–1 mM           |
| olanzapine                        | 132539-06-1 | Sigma O1141                   | DMSO    |                                      |                                             | 3.125 $\mu$ M–100 $\mu$ M    |
| doxorubicin hydrochloride         | 25316-40-9  | J&K 113424                    | water   | [6]                                  | ~1                                          | 0.31 $\mu$ M–20 $\mu$ M      |

|                           |           |                 |       |     |       |               |
|---------------------------|-----------|-----------------|-------|-----|-------|---------------|
| lead[II]chloride          | 7758-95-4 | Sigma 7758-95-4 | water | [7] |       | 1.6 µM–100 µM |
| Gentamicin sulfate        | 1405-41-0 | Sigma G1914     | water | [8] |       | 60 µM–5 mM    |
| Valproic acid sodium salt | 1069-66-5 | Sigma P4543     | water | [9] | 152.4 | 0.6 mM–10 mM  |

b: Drug-induced liver injury (DILI) likelihood scores and injury patterns in chosen chemicals.

| Chemical       | DILI Likelihood Score and Injury Pattern                                                 | IC50 (µM) in Hepatocellular Models and Reference | Toxicity in Other Organs               |
|----------------|------------------------------------------------------------------------------------------|--------------------------------------------------|----------------------------------------|
| Amiodarone     | A; hepatocellular injury                                                                 | 45; [10]                                         | Lungs, thyroid                         |
| Diclofenac     | A; hepatocellular injury                                                                 | >500; [10]                                       | Kidney                                 |
| Clozapine      | B; hepatocellular and mixed                                                              | 4.1; [10]                                        | Heart, pancreas                        |
| Gentamicin     | E                                                                                        | -                                                | Kidney                                 |
| Olanzapine     | No or very rare clinically apparent DILI                                                 | -                                                |                                        |
| Ibuprofen      | A; very rare DILI                                                                        | -                                                | Kidney                                 |
| Paraquat       | Acute liver toxicity                                                                     |                                                  | Respiratory tract, kidney              |
| Valproic acid  | A; hepatocellular                                                                        | >100; [10]                                       | Lung, brain                            |
| Pamidronate    | E                                                                                        | -                                                | Kidney                                 |
| Cyclosporine   | C; mild transient elevations of bilirubin and alkaline phosphate–cholestatic injury      | >100; [10]                                       | Kidney, heart                          |
| Busulphan      | A; sinusoidal obstruction syndrome (dose dependent and prolonged) and cholestatic injury | -                                                | Lung                                   |
| Doxorubicin    | B; transient elevations of enzymes                                                       | -                                                | Heart, kidney                          |
| Cerium dioxide | No DILI                                                                                  | -                                                | Respiratory tract                      |
| Lead Chloride  | No DILI                                                                                  | -                                                | Nervous, cardiovascular system, kidney |

Likelihood codes: A: well known cause of clinically apparent liver injury; B: likely cause of clinically apparent liver injury; C: probable rare cause of clinically apparent liver injury; D: very rare cases of liver injury; E: unlikely cause of liver injury. -, unavailable

**Table S6.** TempO-Seq treatment concentrations.

| Chemical                 | Treatment (µM)    | Time (hours) |
|--------------------------|-------------------|--------------|
| Ibuprofen sodium salt    | 50, 100, 200      | 24, 72       |
| Diclofenac sodium salt   | 7.5, 37.5, 75     | 24, 72       |
| Clozapine                | 1, 5, 10          | 24, 72       |
| Olanzapine               | 0.5, 2.5, 5       | 24, 72       |
| Paraquat dichloride      | 12.5, 25, 50, 100 | 24           |
| Amiodarone hydrochloride | 2.5, 5, 10, 20    | 24           |
| Gentamicin sulfate       | 12.5, 25, 50, 100 | 24           |

**Table S9.** Cluster-central genes chosen based on differential expression in TempO-Seq data and evidence and relevance in chemical-induced toxicity.

| Gene | Module TempO- | Module TG- | Fold Change per M Increase in Concentration (Adjusted <i>p</i> -value from DESeq2) | Function in Toxicity | Reference |
|------|---------------|------------|------------------------------------------------------------------------------------|----------------------|-----------|
|------|---------------|------------|------------------------------------------------------------------------------------|----------------------|-----------|

|                | Seq and<br>kME | GATES<br>and kME                                 | Diclofenac     | Amiodarone     | Ibuprofen      |                                                                                                                                  |
|----------------|----------------|--------------------------------------------------|----------------|----------------|----------------|----------------------------------------------------------------------------------------------------------------------------------|
| <i>ATF4</i>    | UPR,<br>0.872  | RNA<br>metabolism,<br>0.832                      | 1.017 (0.0000) |                | 1.003 (0.0001) | induced under ER<br>stress, regulates<br>UPR, oxidative<br>stress response [11]                                                  |
| <i>BCL2L1</i>  | UPR,<br>0.826  | Metabolism<br>(general/<br>xenobiotic),<br>0.884 | 1.011 (0.0002) |                |                | Inhibitor/promoter<br>of apoptosis [12]                                                                                          |
| <i>DDIT3</i>   | UPR,<br>0.825  | UPR/ER<br>stress, 0.796                          | 1.038 (<0.001) | 1.029 (0.0432) | 1.004 (0.0049) | DNA damage<br>response, UPR<br>response [11]                                                                                     |
| <i>EIF1</i>    | UPR,<br>0.824  | RNA<br>metabolism,<br>0.866                      | 1.013 (<0.001) |                |                | phosphorylated by<br>PERK, halts protein<br>synthesis [11]                                                                       |
| <i>HERPUD1</i> | UPR,<br>0.857  | UPR/ER<br>stress, 0.889                          | 1.024 (<0.001) |                |                | ERAD [13]                                                                                                                        |
| <i>HSPA5</i>   | UPR,<br>0.848  | UPR/ER<br>stress, 0.868                          | 1.027 (<0.001) | 1.022 (0.0279) |                | chaperon, master<br>regulator of ER<br>stress pathways [11]                                                                      |
| <i>HSPA6</i>   | UPR,<br>0.774  | RNA<br>metabolism,<br>0.903                      | 1.052 (<0.001) |                |                | chaperon [11]                                                                                                                    |
| <i>MAFF</i>    | UPR,<br>0.853  | RNA<br>metabolism,<br>0.889                      | 1.042 (<0.001) |                |                | Nrf2 pathway,<br>cytoprotective<br>function [14]                                                                                 |
| <i>SLC3A2</i>  | UPR,<br>0.850  | RNA<br>metabolism,<br>0.762                      | 1.016 (<0.001) |                |                | involved in<br>glutathione<br>synthesis by<br>forming<br>heterotrimer with<br>SLC7A11.<br>Regulator of UPR<br>and apoptosis [15] |
| <i>PGM3</i>    | UPR,<br>0.658  | UPR and ER<br>stress, 0.793                      | 1.011 (<0.001) |                |                | Decrease in<br>phosphoglucose<br>activity is<br>correlated with<br>hepatic injury. [16]                                          |

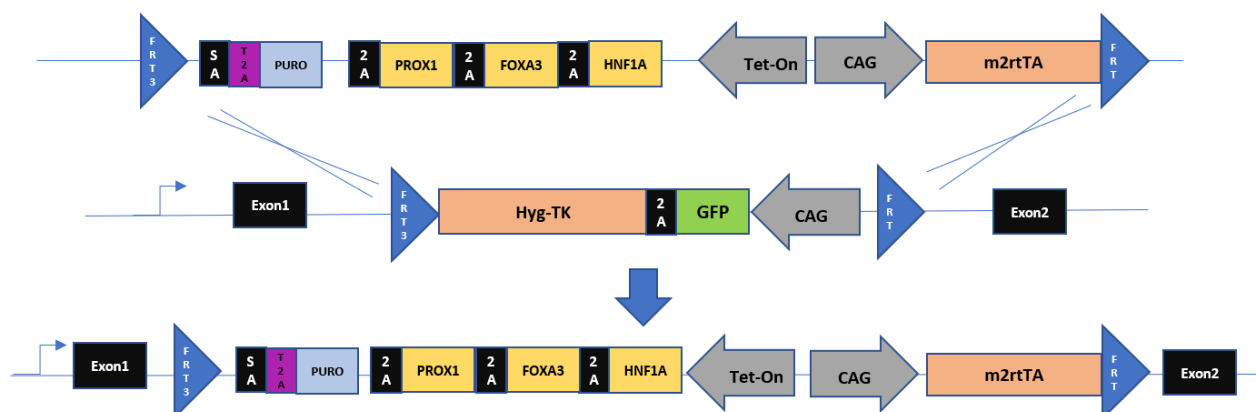

**Figure S1.** Genome engineering for generation of the SBAD-3x iPSC line. Schematic representation of genome engineering for generation of the SBAD2-3x line. The iPSC line SBAD2-3x was generated by the insertion of Hepatocyte nuclear factor 1-alpha (*HNF1a*), Prospero Homeobox 1 (*PROX1*), and Forkhead box protein A3 (*FOXA3*), using recombinase mediated cassette exchange (RMCE). The upper figure shows the engineered *AAVS1* locus as described in [17], and the bottom figure shows the *AAVS1* with the integrated cassette of the three transcription factors. Briefly, flippase recombines the FRT-flanked cassette with the three transcription factors into the *AAVS1* safe harbor locus using the FRT sites in the SBAD2-FRT line. FRT: Flippase recognition target. Hyg-TK: Hygromycin resistant cassette fused to Thymidine kinase. CAG: chimeric promoter with cytomegalovirus (CMV) enhancer, chicken beta-Actin promoter and rabbit beta-Globin splice acceptor site. Ex: exon. SA: splice acceptor. Puro: puromycin resistance cassette. Tet-On: promoter containing Tetracycline response element (TRE) and CMV minimal promoter. m2rtTA: reverse tetracycline transactivator. LDM: Liver differentiation medium. LDMAA: LDM with amino acids, no glycine added. LDMAAGLY: LDM with amino acids, including glycine. Dox: Doxycycline. BMP4: Bone morphogenetic protein-4. FGF1: Fibroblast growth factor-1. HGF: Hepatocyte growth factor.



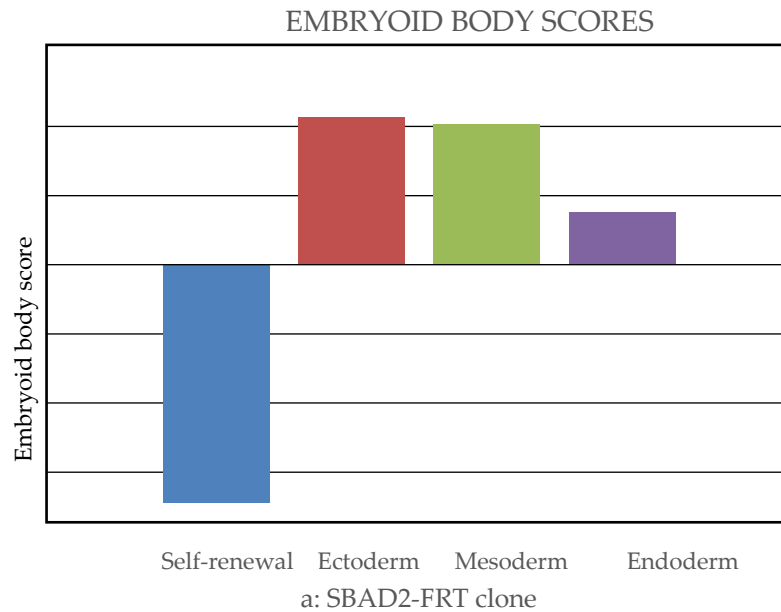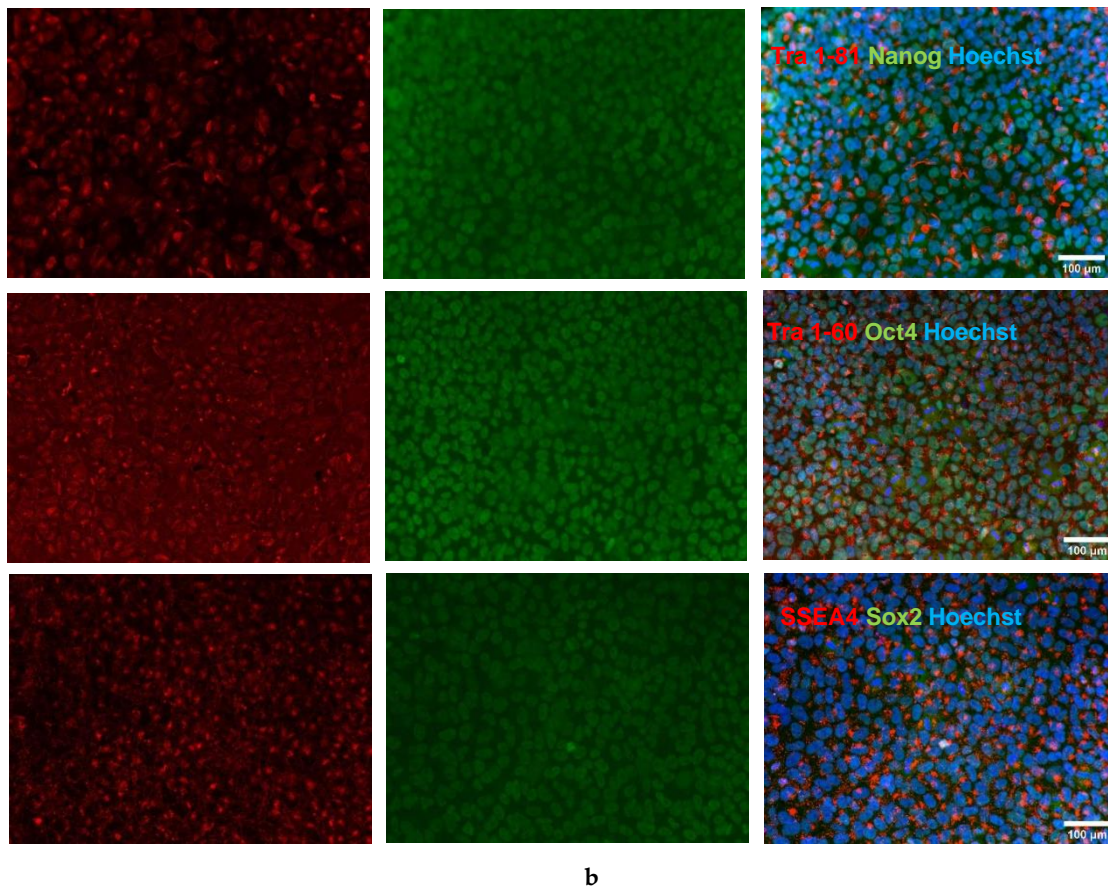

**Figure S2.** Characterization of the SBAD2-FRT line for pluripotency. **(a).** SBAD2-FRT iPSC were differentiated as embryoid bodies for 7 days and then subjected to Scorecard® assay to assess three germ line differentiation. **(b).** Undifferentiated SBAD2-FRT iPSCs were subjected to immunostaining for the pluripotency markers TRA-1-81, NANOG, TRA-1-60, OCT4, SSEA4, and SOX2. Scale bar indicates 100 µm. TRA-1-81: Podocalyxin-like protein, OCT4: POU class 5 homeobox 1, NANOG: nanog homeobox, SOX2: SRY-box transcription factor 2

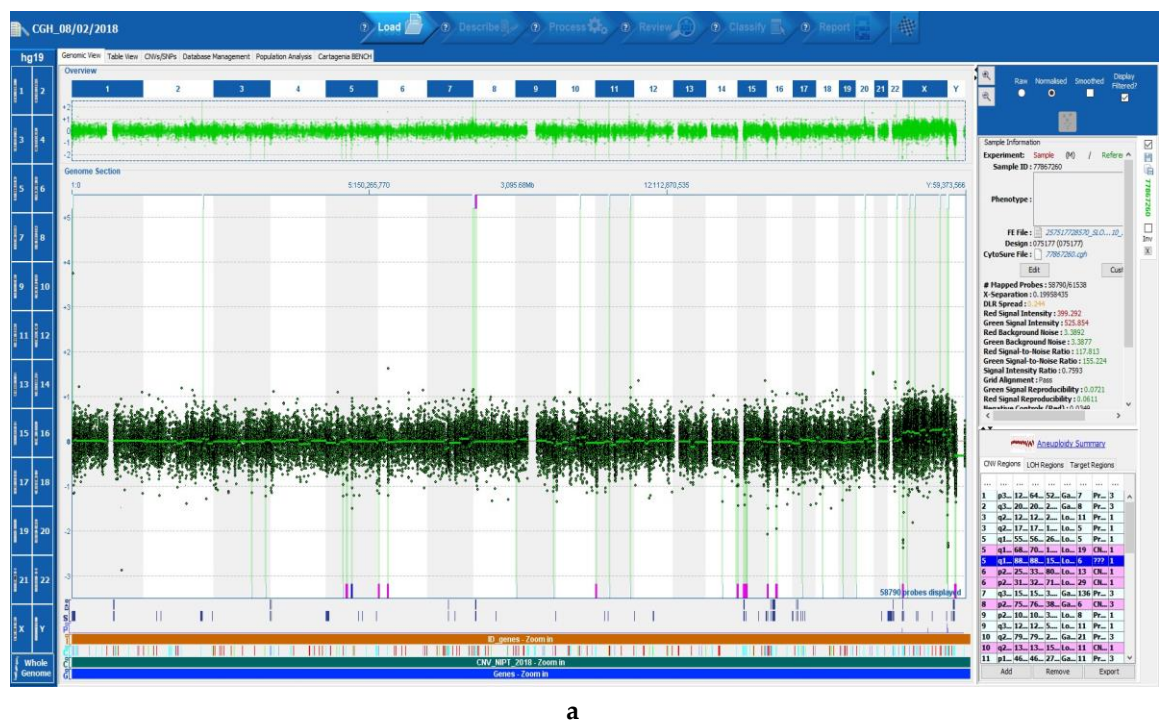

|               | Exp 21          | Exp 22          | Exp 25          |
|---------------|-----------------|-----------------|-----------------|
|               | allele1/allele2 | allele1/allele2 | allele1/allele2 |
| C_1563023_10  | VIC/FAM         | VIC/FAM         | VIC/FAM         |
| C_1801627_20  | VIC/VIC         | VIC/VIC         | VIC/VIC         |
| C_2728408_10  | FAM/FAM         | FAM/FAM         | FAM/FAM         |
| C_1250735_20  | FAM/FAM         | FAM/FAM         | FAM/FAM         |
| C_15935210_10 | VIC/VIC         | VIC/VIC         | VIC/VIC         |
| C_7431888_10  | VIC/FAM         | VIC/FAM         | VIC/FAM         |
| C_3227711_10  | FAM/FAM         | FAM/FAM         | FAM/FAM         |
| C_1902433_10  | VIC/FAM         | VIC/FAM         | VIC/FAM         |
| C_30044763_10 | VIC/FAM         | VIC/FAM         | VIC/FAM         |
| C_31386842_10 | VIC/FAM         | VIC/FAM         | VIC/FAM         |
| C_33211212_10 | VIC/FAM         | VIC/FAM         | VIC/FAM         |
| C_26524789_10 | FAM/FAM         | FAM/FAM         | FAM/FAM         |
| C_11821218_10 | FAM/FAM         | FAM/FAM         | FAM/FAM         |
| C_43852_10    | VIC/FAM         | VIC/FAM         | VIC/FAM         |
| C_1670459_10  | FAM/FAM         | FAM/FAM         | FAM/FAM         |
| C_8924366_10  | VIC/FAM         | VIC/FAM         | VIC/FAM         |
| C_1007630_10  | VIC/FAM         | VIC/FAM         | VIC/FAM         |
| C_11522992_10 | VIC/FAM         | VIC/FAM         | VIC/FAM         |
| C_7421900_10  | VIC/VIC         | VIC/VIC         | VIC/VIC         |
| C_10076371_10 | VIC/FAM         | VIC/FAM         | VIC/FAM         |
| C_26546714_10 | VIC/FAM         | VIC/FAM         | VIC/FAM         |
| C_1122315_10  | VIC/VIC         | VIC/VIC         | VIC/VIC         |
| C_27402849_10 | VIC/VIC         | VIC/VIC         | VIC/VIC         |
| C_7457509_10  | VIC/FAM         | VIC/FAM         | VIC/FAM         |
| C_29619553_10 | VIC/FAM         | VIC/FAM         | VIC/FAM         |
| C_11710129_10 | VIC/VIC         | VIC/VIC         | VIC/VIC         |
| C_2953330_10  | FAM/FAM         | FAM/FAM         | FAM/FAM         |
| C_1027548_20  | VIC/FAM         | VIC/FAM         | VIC/FAM         |
| C_8850710_10  | VIC/VIC         | VIC/VIC         | VIC/VIC         |
| C_1083232_10  | VIC/VIC         | VIC/VIC         | VIC/VIC         |
| C_16205730_10 | VIC/FAM         | VIC/FAM         | NOAMP           |
| C_8938211_20  | FAM/FAM         | FAM/FAM         | FAM/FAM         |

**Figure S3.** Profiling for genomic aberrations and SNPs. **a.** aCGH of the SBAD2-FRT line detected no genomic aberrations >500 kb. **b.** SNP profiling of the SBAD2-FRT line for a standard SNP panel. SNP: short nucleotide polymorphism.

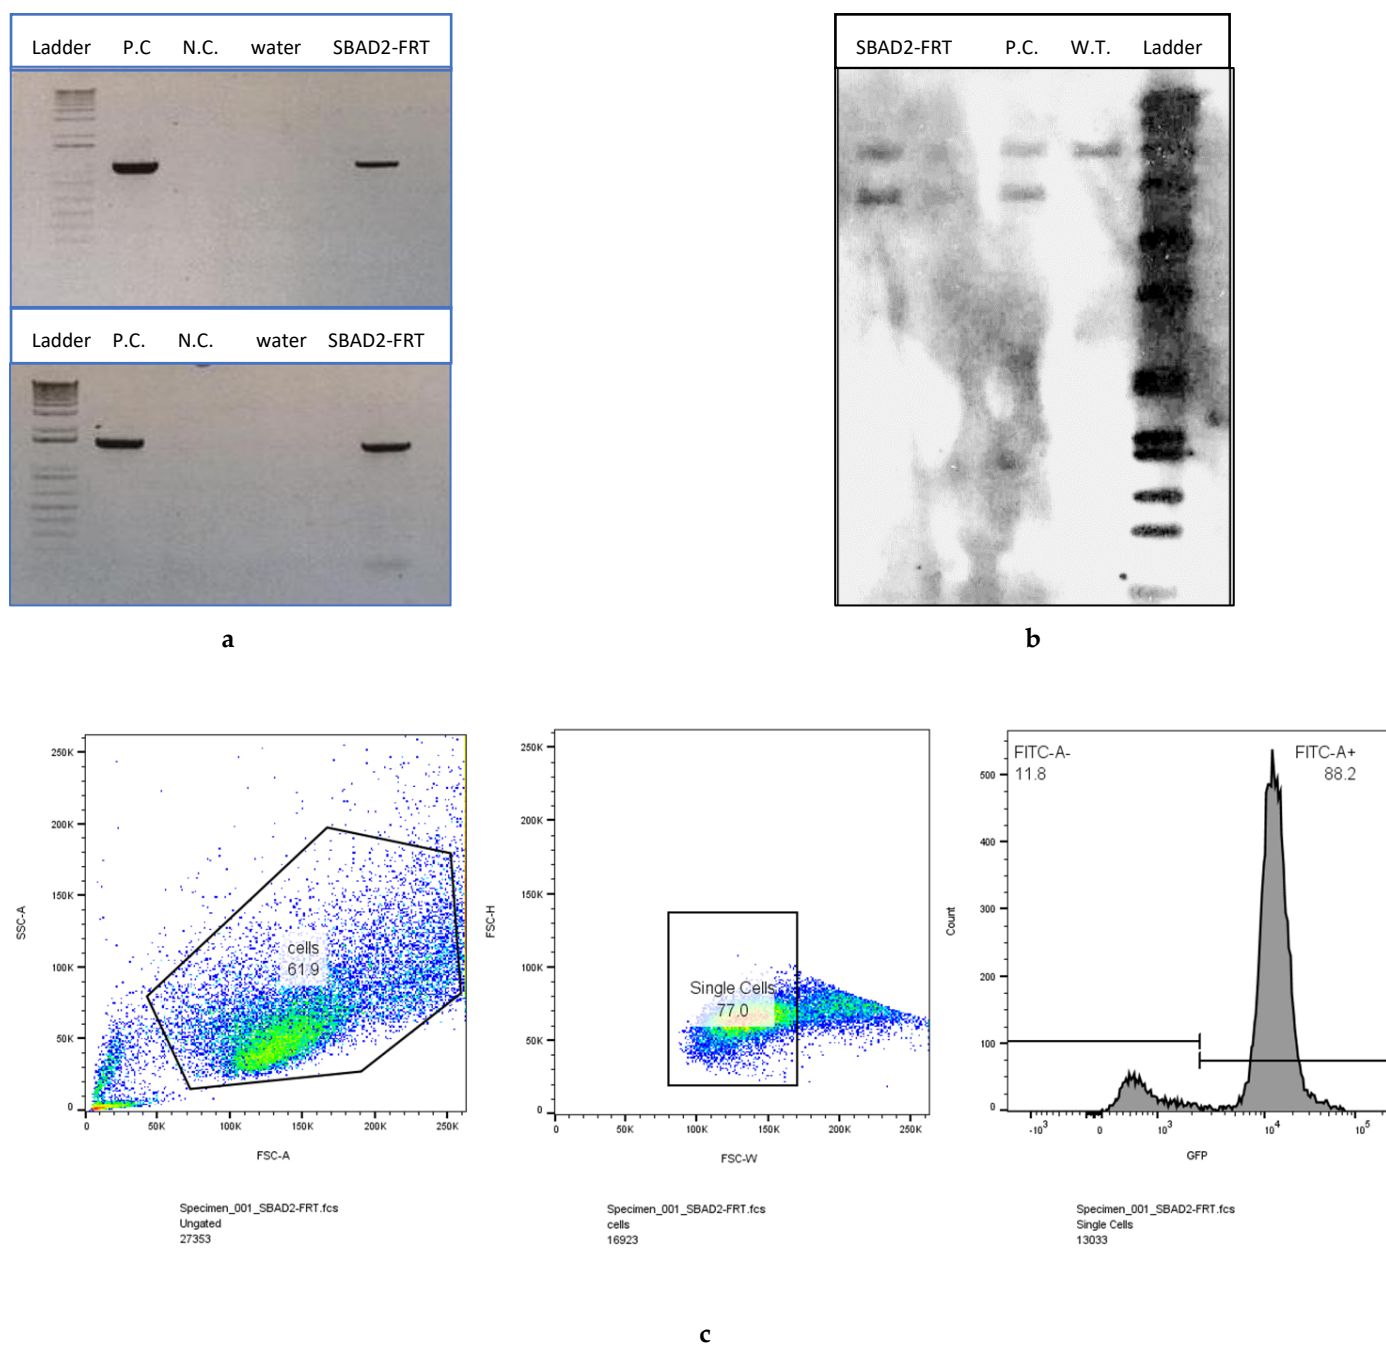

**Figure S4.** Confirmation of correct insertion of the FRT cassette in the SBAD2-FRT line. **(a).** 5' and 3' junction PCR assays show correct insertion of FRT cassette in the SBAD2-FRT line when compared to a positive control, i.e. H9 embryonic stem cell line with FRT cassette. Primers used are listed in Table S10. **(b).** Southern blotting using a 5' internal digoxigenin-labelled probe shows mono-allelic insertion of the cassette in the line, and absence of random integrations. Probe sequence listed in Table S10. **(c).** Flow cytometry of the SBAD2-FRT parent line demonstrates presence of 88.2% GFP-positive cells, demonstrating efficient incorporation of the FRT flanked cassette (as described in Figure S1). GFP: green fluorescent protein.

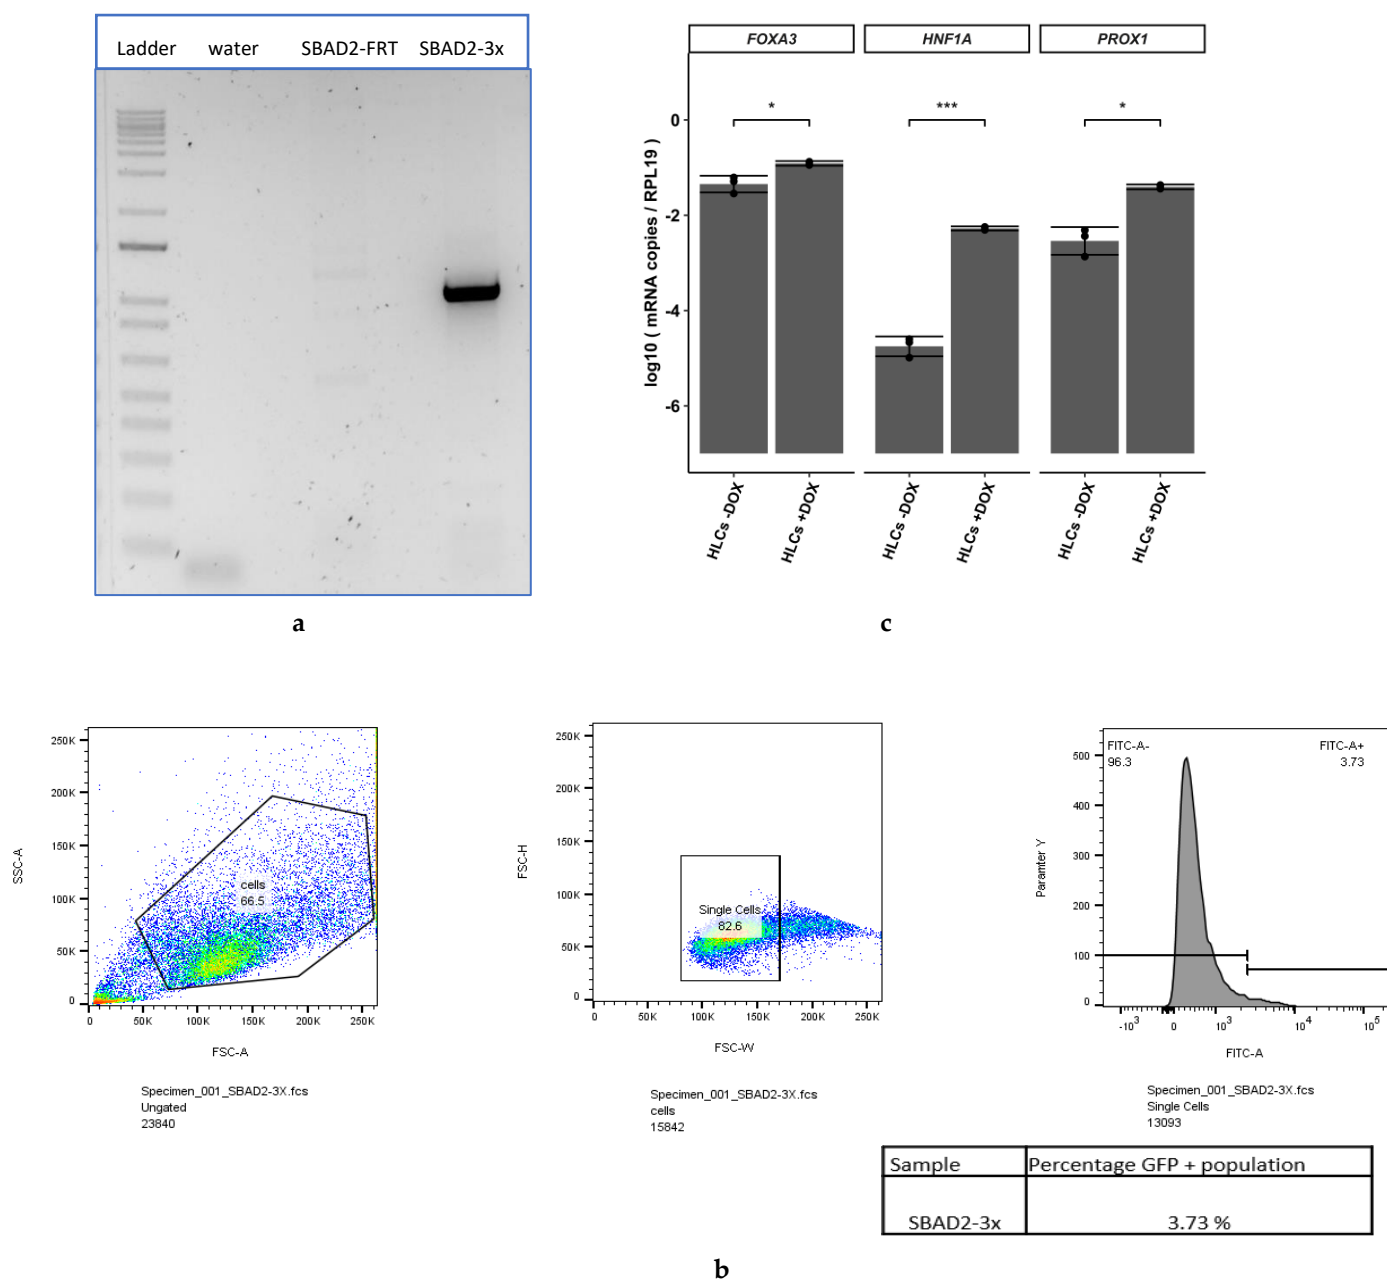

**Figure S5.** Confirmation of insertion of 3x cassette in the SBAD2-3x lines. **a.** 5' junction assay on SBAD2-3x line with primer pairs within the 3x cassette and in the genome demonstrates insertion of the 3x gene cassette in the AAVS1 locus, when compared to negative control (SBAD2-FRT) (primers used are listed in Table S10). **b.** Flow cytometry of the SBAD2-3x line demonstrates that 96.3% of the cells were GFP-negative, demonstrating successful recombination with the inducible TF cassette, (as described in Figure S1). **c.** RT-qPCR for the 3x transcription factors in SBAD2-3x iPSCs differentiated until d20 using AAGLY medium with and without addition of doxycycline shows increased expression upon doxycycline induction of the 3x genes.  $n = 2$  independent differentiations. Significance is calculated as compared to SBAD2-3x HLCs without doxycycline by unpaired two-tailed Student's  $t$ -test,  $*p < 0.05$ ,  $**p < 0.01$ .

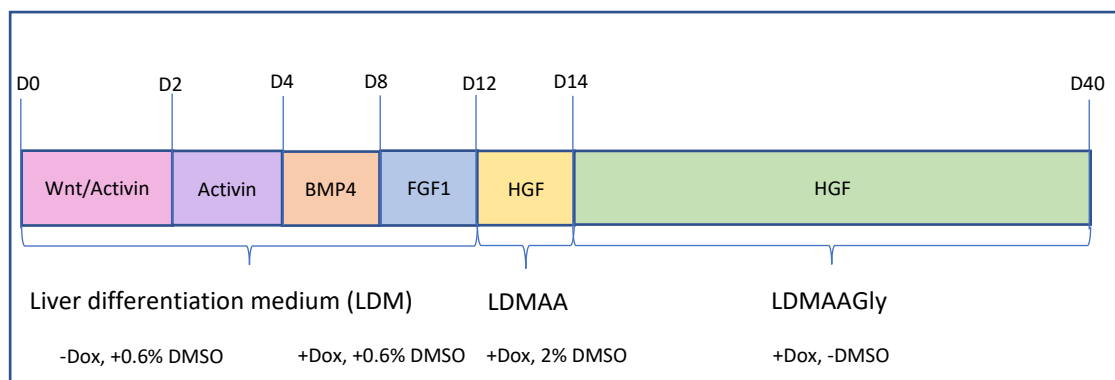

**Figure S6.** Protocol for differentiation SBAD-3x iPSC to HLCs. Schematic representation of the protocol for the differentiation of SBAD-3x iPSC to hepatocyte-like cells (HLCs). LDM: Liver differentiation medium. LDMAA: LDM with amino acids, no glycine added. LDMAAGLY: LDM with amino acids, including glycine. Dox: Doxycycline. BMP4: Bone morphogenetic protein-4. FGF1: Fibroblast growth factor-1. HGF: Hepatocyte growth factor.



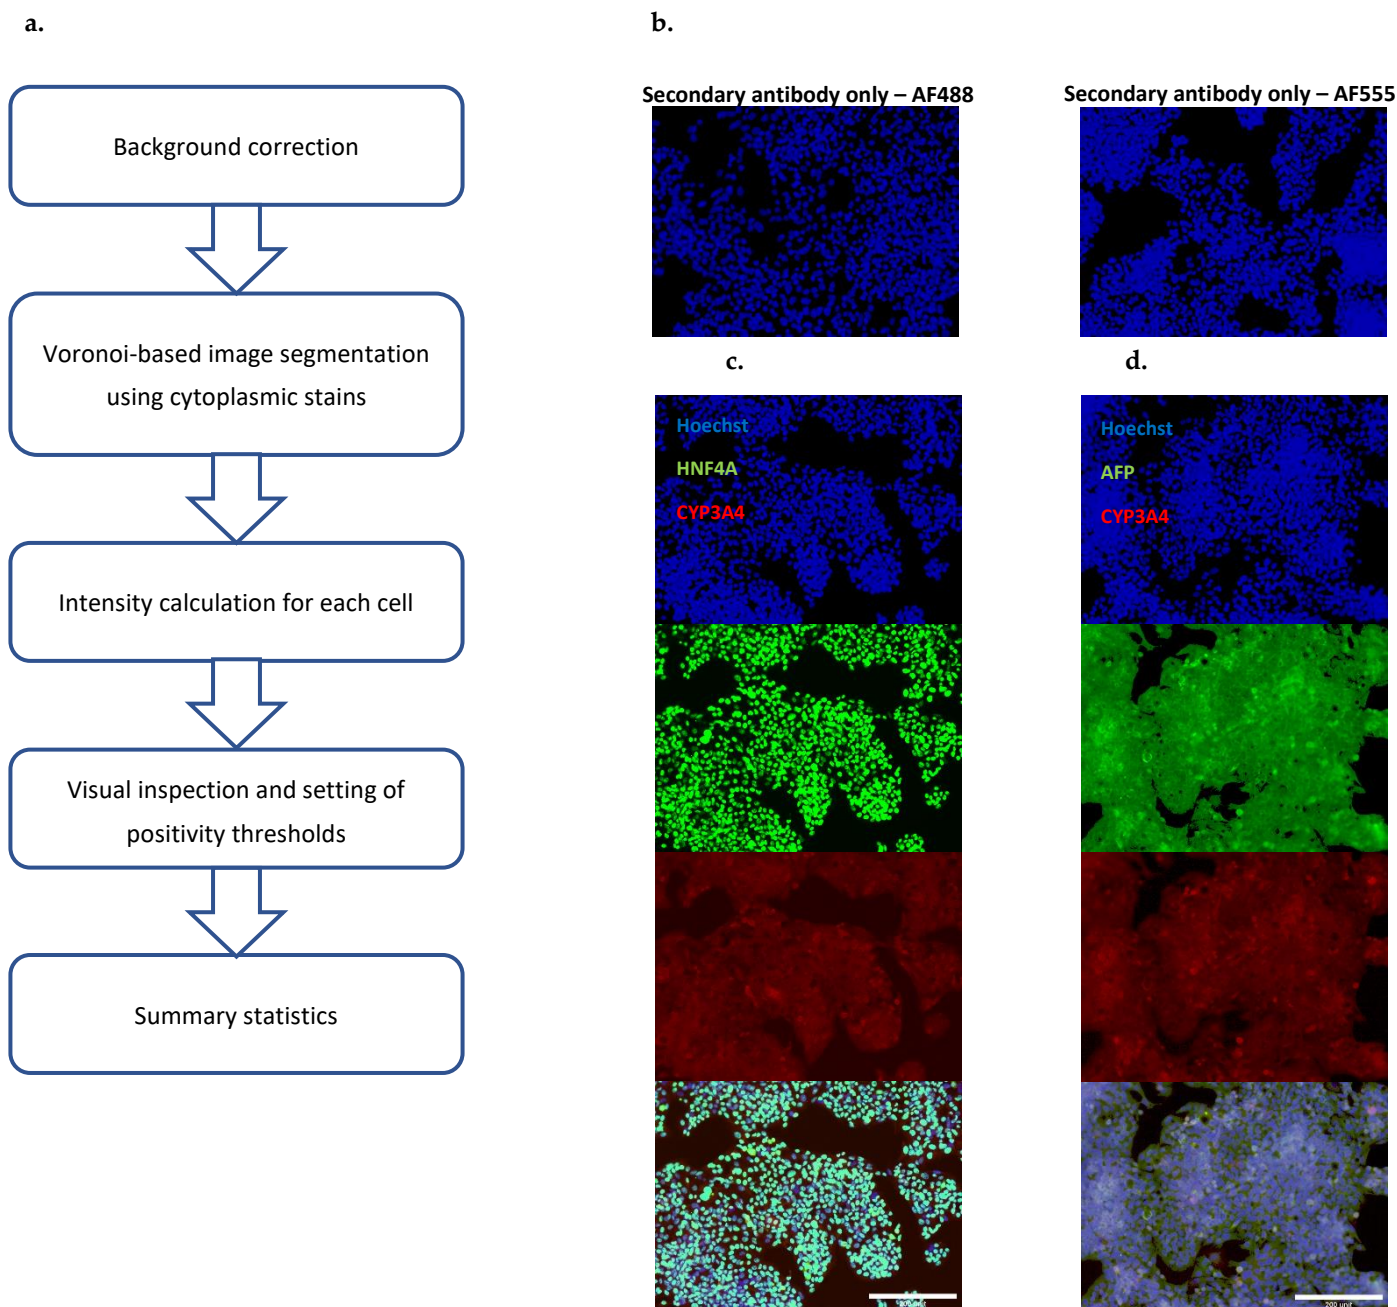

**Figure S7.** Immunofluorescent staining of HepG2 cells. **a.** Schematic workflow of quantification of imaging done using EBImage and dplyr R packages. **b.** Secondary antibody-only controls for Alexa fluor 488 and Alexa fluor 555. **c.** HepG2 cells were stained for CYP3A4 and HNF4A **d.** HepG2 cells were stained for CYP3A4 and AFP. Scale bar: 200  $\mu$ m.

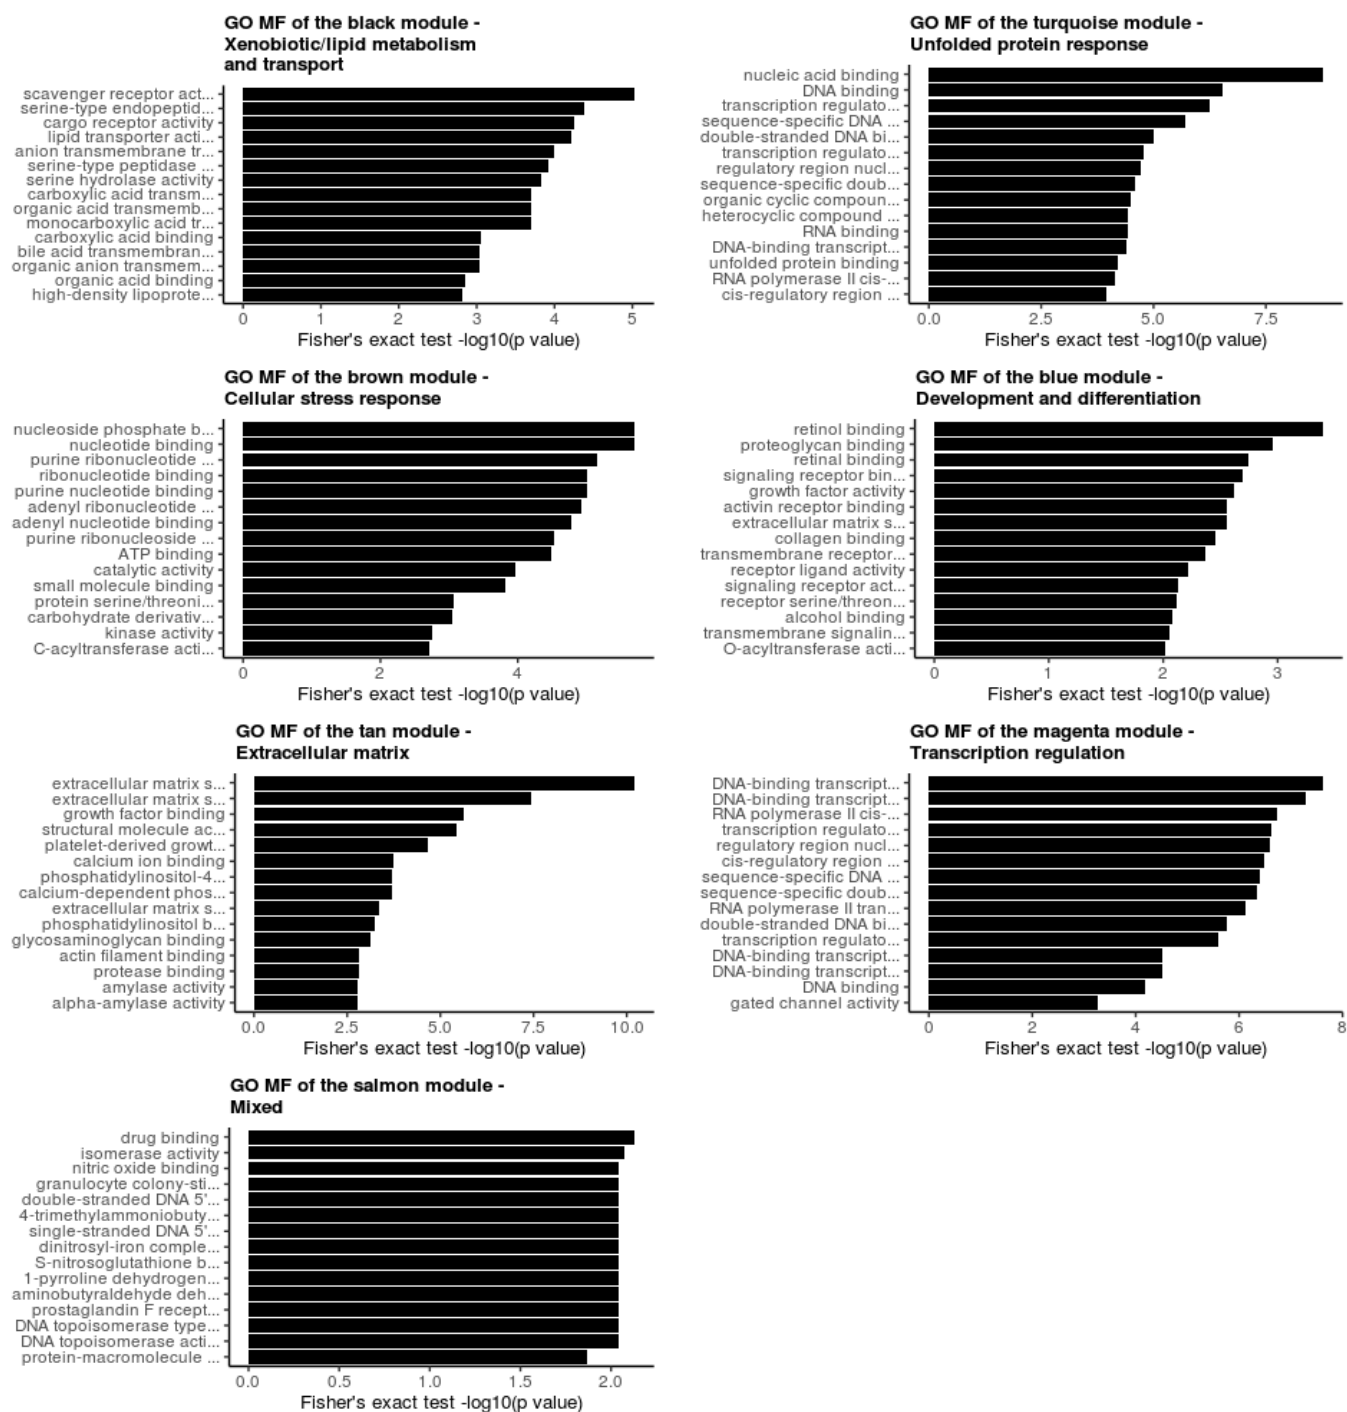

a

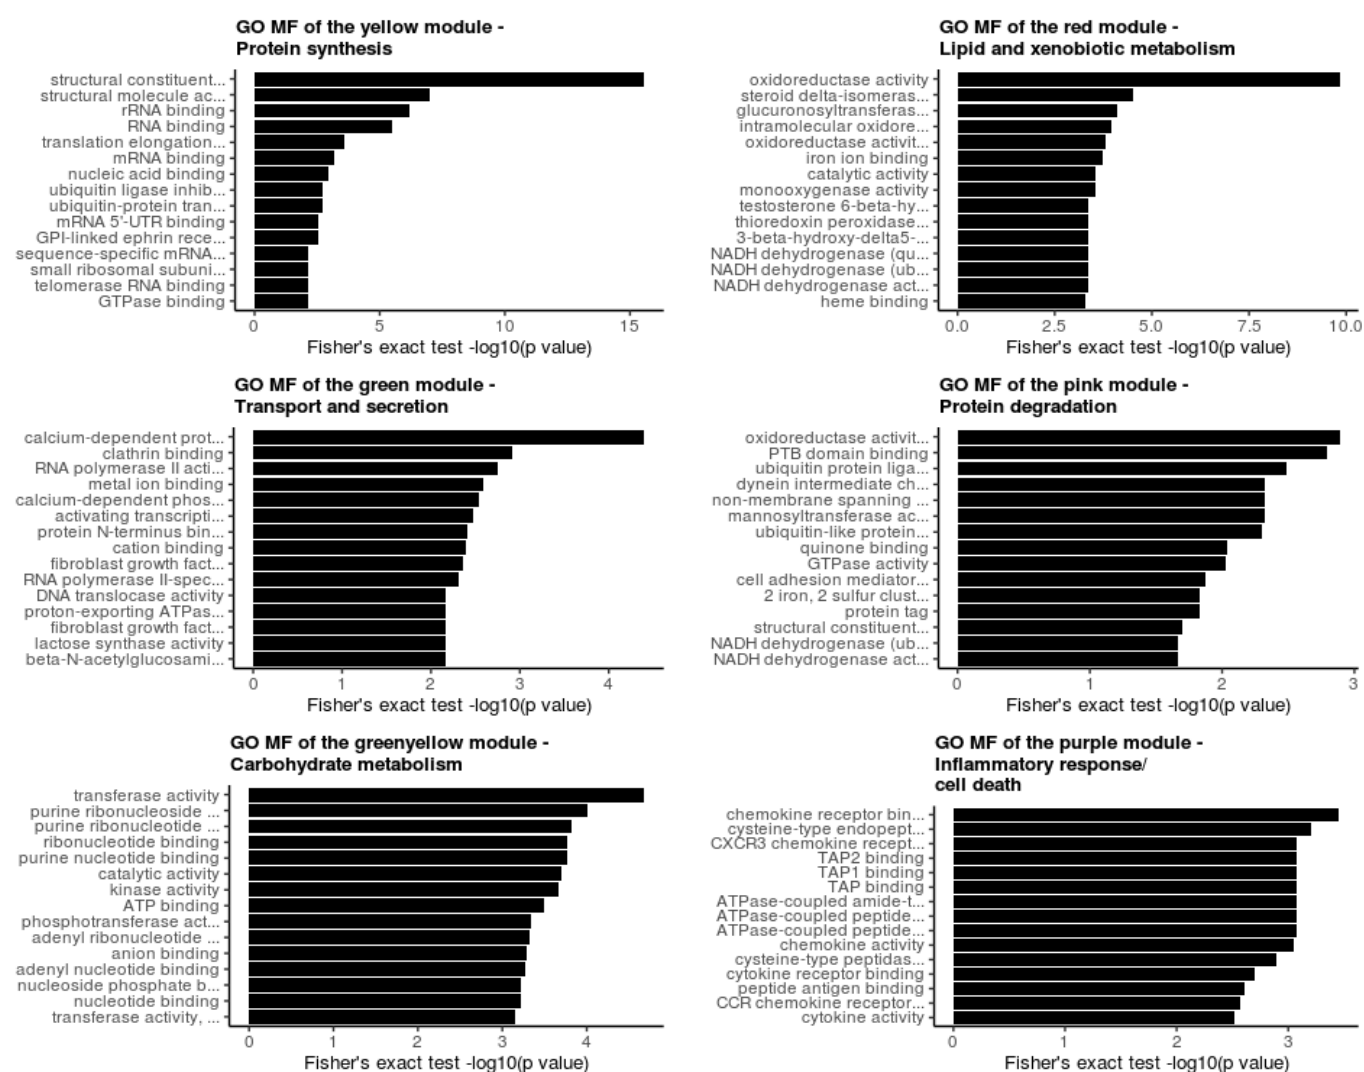

b

**Figure S8. a.** O Molecular Functions for clusters obtained from WGCNA (Figure 3.b.). Black -lipid and xenobiotic metabolism and transport; turquoise—Unfolded Protein Response (UPR); brown—cellular stress response; blue—development and differentiation; tan—Extracellular Matrix (ECM); magenta—transcription regulation; Salmon—mixed. **b.** O Molecular Functions for clusters obtained from WGCNA (Figure 3.b.). Yellow -protein synthesis; red—lipid and xenobiotic metabolism; green—transport and secretion; pink—protein degradation; greenyellow—carbohydrate metabolism; purple—inflammatory response/cell death.



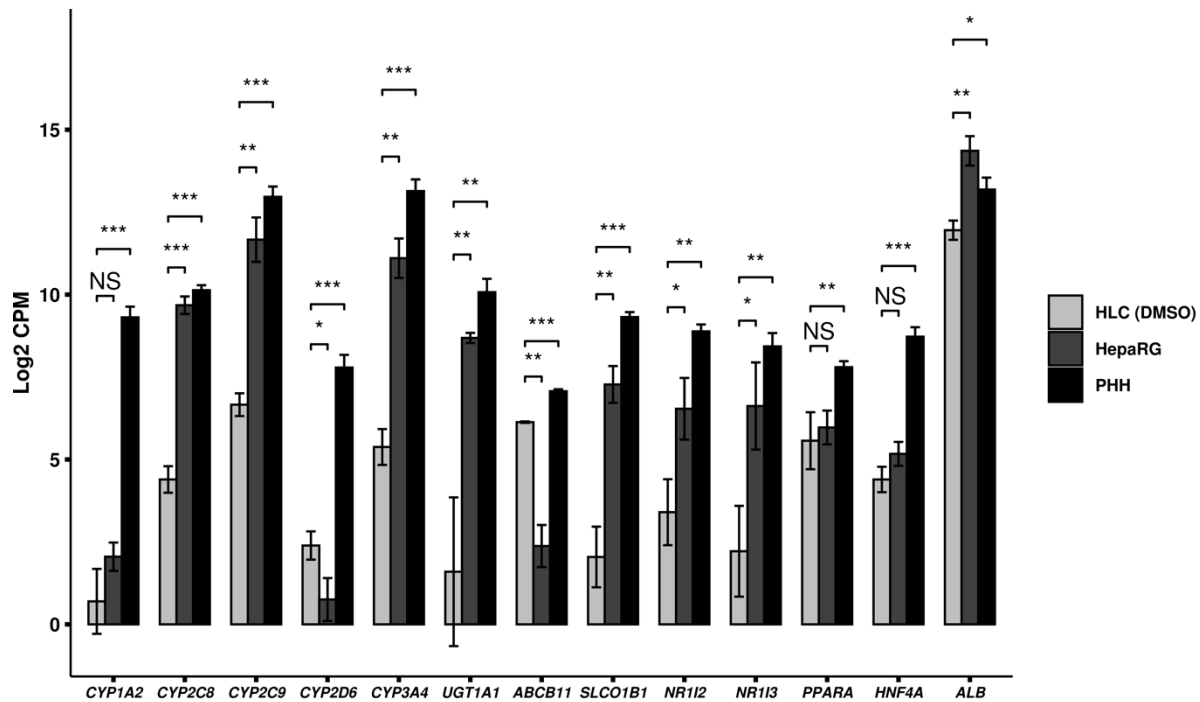

**Figure S9.** Expression levels of genes involved in phase I and phase II metabolism and mature hepatocyte markers from TempO-Seq data, in SBAD2-3x-AAGLY-HLCs relative to PHHs and HepaRG cells. (\*:  $p < 0.05$ , \*\*:  $p < 0.01$ , \*\*\*:  $p < 0.001$ , NS: Not significant).

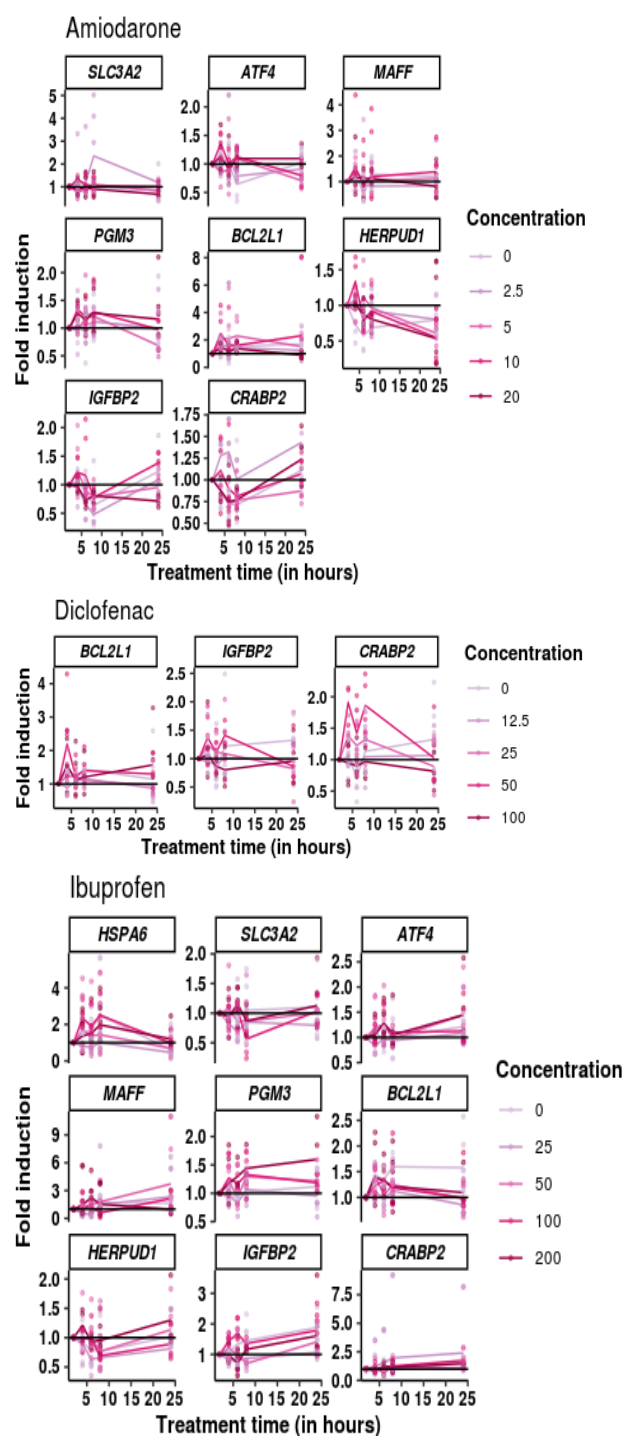

**Figure S10.** Cellular stress genes show differential expression at different time-points after treatment of SBAD2-3x-AAGLY HLCs with Amiodarone, Diclofenac, and Ibuprofen. RT-qPCR analysis of the genes selected in d40 SBAD2-3x-AAGLY HLCs treated with increasing concentrations of amiodarone, diclofenac, or ibuprofen over a period of 24 h, for genes as identified in Figure 4.a. X-axes indicate the treatment times.

## References:

1. Bock, C.; Kiskinis, E.; Verstappen, G.; Gu, H.; Boulting, G.; Smith, Z.D.; Ziller, M.; Croft, G.; Amoroso, M.W.; Oakley, D.; et al. Reference Maps of Human ES and iPS Cell Variation Enable High-Throughput Characterization of Pluripotent Cell Lines. *Cell* 2011, 144, 439–452. <https://doi.org/10.1016/j.cell.2010.12.032>.

2. Xu, J.J.; Henstock, P.V.; Dunn, M.C.; Smith, A.R.; Chabot, J.R.; De Graaf, D. Cellular Imaging Predictions of Clinical Drug-Induced Liver Injury. *Toxicol. Sci.* **2008**, *105*, 97–105. <https://doi.org/10.1093/toxsci/kfn109>.
3. Lin, W.; Huang, Y.-W.; Zhou, X.-D.; Ma, Y. Toxicity of Cerium Oxide Nanoparticles in Human Lung Cancer Cells. *Int. J. Toxicol.* **2006**, *25*, 451–457. <https://doi.org/10.1080/10915810600959543>.
4. García-Rubio, L.; García-Abad, A.M.; Soler, F.; Míguez, M.P. Cytotoxicity of paraquat in freshly isolated rat hepatocytes: Effects of L-carnitine. *BioFactors* **1998**, *8*, 59–64. <https://doi.org/10.1002/biof.5520080111>.
5. Bramlage, P.; Goldis, A. Bioequivalence study of three ibuprofen formulations after single dose administration in healthy volunteers. *BMC Pharmacol.* **2008**, *8*, 18. <https://doi.org/10.1186/1471-2210-8-18>.
6. Barpe, D.R.; Rosa, D.D.; Froehlich, P.E. Pharmacokinetic evaluation of doxorubicin plasma levels in normal and overweight patients with breast cancer and simulation of dose adjustment by different indexes of body mass. *Eur. J. Pharm. Sci.* **2010**, *41*, 458–463. <https://doi.org/10.1016/j.ejps.2010.07.015>.
7. Tchounwou, P.B.; Yedjou, C.G.; Foxx, D.N.; Ishaque, A.B.; Shen, E. Lead-induced cytotoxicity and transcriptional activation of stress genes in human liver carcinoma (HepG2) cells. *Mol. Cell. Biochem.* **2004**, *255*, 161–170. <https://doi.org/10.1023/b:mcbi.0000007272.46923.12>.
8. Regec, A.L.; Trifillis, A.L.; Trump, B.F. The Effect of Gentamicin on Human Renal Proximal Tubular Cells. *Toxicol. Pathol.* **1986**, *14*, 238–241. <https://doi.org/10.1177/019262338601400213>.
9. Rha, J.H.; Jang, I.J.; Lee, K.H.; Chong, W.S.; Shin, S.G.; Lee, N.; Myung, H.J. Pharmacokinetic comparison of two valproic acid formulations: A plain and a controlled release enteric-coated tablets. *J. Korean Med. Sci.* **1993**, *8*, 251–256. <https://doi.org/10.3346/jkms.1993.8.4.251>.
10. Proctor, W.R.; Foster, A.J.; Vogt, J.; Summers, C.; Middleton, B.; Pilling, M.; Shienson, D.; Kijanska, M.; Ströbel, S.; Kelm, J.M.; et al. Utility of spherical human liver microtissues for prediction of clinical drug-induced liver injury. *Arch. Toxicol.* **2017**, *91*, 2849–2863. <https://doi.org/10.1007/s00204-017-2002-1>.
11. Tsutsumi, S.; Gotoh, T.; Tomisato, W.; Mima, S.; Hoshino, T.; Hwang, H.-J.; Takenaka, H.; Tsuchiya, T.; Mori, M.; Mizushima, T. Endoplasmic reticulum stress response is involved in nonsteroidal anti-inflammatory drug-induced apoptosis. *Cell Death Differ.* **2004**, *11*, 1009–1016. <https://doi.org/10.1038/sj.cdd.4401436>.
12. Wong, W.W.-L.; Puthalakath, H. Bcl-2 family proteins: The sentinels of the mitochondrial apoptosis pathway. *IUBMB Life* **2008**, *60*, 390–397. <https://doi.org/10.1002/iub.51>.
13. Hori, O.; Ichinoda, F.; Yamaguchi, A.; Tamatani, T.; Taniguchi, M.; Koyama, Y.; Katayama, T.; Tohyama, M.; Stern, D.M.; Ozawa, K.; et al. Role of Herp in the endoplasmic reticulum stress response. *Genes Cells* **2004**, *9*, 457–469. <https://doi.org/10.1111/j.1356-9597.2004.00735.x>.
14. Katsuoka, F.; Motohashi, H.; Ishii, T.; Aburatani, H.; Engel, J.D.; Yamamoto, M. Genetic Evidence that Small Maf Proteins Are Essential for the Activation of Antioxidant Response Element-Dependent Genes. *Mol. Cell. Biol.* **2005**, *25*, 8044–8051. <https://doi.org/10.1128/mcb.25.18.8044-8051.2005>.
15. Liu, C.; Li, X.; Li, C.; Zhang, Z.; Gao, X.; Jia, Z.; Chen, H.; Jia, Q.; Zhao, X.; Liu, J.; et al. SLC3A2 is a novel endoplasmic reticulum stress-related signaling protein that regulates the unfolded protein response and apoptosis. *PLoS ONE* **2018**, *13*, e0208993. <https://doi.org/10.1371/journal.pone.0208993>.
16. Ashida, H.; Kanazawa, K.; Danno, G.-I. Hepatic Phosphoglucosyltransferase Activity as a Marker of Oxidative Stress Induced by Pro-oxidative Drugs. *Biosci. Biotechnol. Biochem.* **1994**, *58*, 55–59. <https://doi.org/10.1271/bbb.58.55>.
17. Ordovás, L.; Boon, R.; Pistoni, M.; Chen, Y.; Wolfs, E.; Guo, W.; Sambathkumar, R.; Bobis-Wozowicz, S.; Helsen, N.; Vanhove, J.; et al. Efficient Recombinase-Mediated Cassette Exchange in hPSCs to Study the Hepatocyte Lineage Reveals AAVS1 Locus-Mediated Transgene Inhibition. *Stem Cell Rep.* **2015**, *5*, 918–931. <https://doi.org/10.1016/j.stemcr.2015.09.004>.
